# Supplementary material for: Widespread Hypomethylation Occurs Early and Synergizes with Gene Amplification during Esophageal Carcinogenesis
Source: PLOS journal article supplement (doi:10.1371/journal.pgen.1001356), 2011-03-31
Supplement: S5 (10.1371/journal.pgen.1001356.s005) [file journal.pgen.1001356.s005]

| **Table 2: Genes overexpressed and hypomethylated during transformation of normal esophageal squamous epithelium to Barett's esophagus and low grade dysplasia** | | | | |
| --- | --- | --- | --- | --- |
|  |  |  |  |  |
| **GE Probe** | **Entrez ID** | **Symbol** | **Name** | **CytoBand** |
| NM_000666 | 95 | ACY1 | aminoacylase 1 | 3p21.1 |
| AY341427 | 163 | AP2B1 | adaptor-related protein complex 2, beta 1 subunit | 17q11.2-q12 |
| NM_001150 | 290 | ANPEP | alanyl (membrane) aminopeptidase (aminopeptidase N, aminopeptidase M, microsomal aminopeptidase, CD13, p150) | 15q25-q26 |
| NM_001003954 | 312 | ANXA13 | annexin A13 | 8q24.13 |
| NM_001644 | 339 | APOBEC1 | apolipoprotein B mRNA editing enzyme, catalytic polypeptide 1 | 12p13.1 |
| NM_000049 | 443 | ASPA | aspartoacylase (Canavan disease) | 17pter-p13 |
| NM_004056 | 767 | CA8 | carbonic anhydrase VIII | 8q11-q12 |
| M76558 | 776 | CACNA1D | calcium channel, voltage-dependent, L type, alpha 1D subunit | 3p14.3 |
| NM_004063 | 1015 | CDH17 | cadherin 17, LI cadherin (liver-intestine) | 8q22.1 |
| NM_001285 | 1179 | CLCA1 | chloride channel, calcium activated, family member 1 | 1p31-p22 |
| NM_001910 | 1510 | CTSE | cathepsin E | 1q31 |
| NM_000790 | 1644 | DDC | dopa decarboxylase (aromatic L-amino acid decarboxylase) | 7p11 |
| NM_001993 | 2152 | F3 | coagulation factor III (thromboplastin, tissue factor) | 1p22-p21 |
| NM_002033 | 2526 | FUT4 | fucosyltransferase 4 (alpha (1,3) fucosyltransferase, myeloid-specific) | 11q21 |
| NM_007353 | 2768 | GNA12 | guanine nucleotide binding protein (G protein) alpha 12 | 7p22.2 |
| NM_001511 | 2919 | CXCL1 | chemokine (C-X-C motif) ligand 1 (melanoma growth stimulating activity, alpha) | 4q21 |
| NM_134421 | 3241 | HPCAL1 | hippocalcin-like 1 | 2p25.1 |
| NM_030615 | 3834 | KIF25 | kinesin family member 25 | 6q27 |
| NM_002290 | 3910 | LAMA4 | laminin, alpha 4 | 6q21 |
| NM_002293 | 3915 | LAMC1 | laminin, gamma 1 (formerly LAMB2) | 1q31 |
| NM_006149 | 3960 | LGALS4 | lectin, galactoside-binding, soluble, 4 (galectin 4) | 19q13.2 |
| NM_002418 | 4295 | MLN | motilin | 6p21.3 |
| NM_002443 | 4477 | MSMB | microseminoprotein, beta- | 10q11.2 |
| NM_005379 | 4640 | MYO1A | myosin IA | 12q13-q14 |
| NM_002526 | 4907 | NT5E | 5'-nucleotidase, ecto (CD73) | 6q14-q21 |
| NM_002539 | 4953 | ODC1 | ornithine decarboxylase 1 | 2p25 |
| NM_000437 | 5051 | PAFAH2 | platelet-activating factor acetylhydrolase 2, 40kDa | 1p36 |
| NM_002591 | 5105 | PCK1 | phosphoenolpyruvate carboxykinase 1 (soluble) | 20q13.31 |
| NM_006203 | 5144 | PDE4D | phosphodiesterase 4D, cAMP-specific (phosphodiesterase E3 dunce homolog, Drosophila) | 5q12 |
| NM_002619 | 5196 | PF4 | platelet factor 4 (chemokine (C-X-C motif) ligand 4) | 4q12-q21 |
| NM_002644 | 5284 | PIGR | polymeric immunoglobulin receptor | 1q31-q41 |
| NM_005397 | 5420 | PODXL | podocalyxin-like | 7q32-q33 |
| NM_000312 | 5624 | PROC | protein C (inactivator of coagulation factors Va and VIIIa) | 2q13-q14 |
| NM_002852 | 5806 | PTX3 | pentraxin-related gene, rapidly induced by IL-1 beta | 3q25 |
| NM_002909 | 5967 | REG1A | regenerating islet-derived 1 alpha (pancreatic stone protein, pancreatic thread protein) | 2p12 |
| NM_002921 | 5995 | RGR | retinal G protein coupled receptor | 10q23 |
| NM_198235 | 6035 | RNASE1 | ribonuclease, RNase A family, 1 (pancreatic) | 14q11.2 |
| NM_003048 | 6549 | SLC9A2 | solute carrier family 9 (sodium/hydrogen exchanger), member 2 | 2q11.2 |
| BC006317 | 6570 | SLC18A1 | solute carrier family 18 (vesicular monoamine), member 1 | 8p21.3 |
| NM_005415 | 6574 | SLC20A1 | solute carrier family 20 (phosphate transporter), member 1 | 2q11-q14 |
| NM_177534 | 6817 | SULT1A1 | sulfotransferase family, cytosolic, 1A, phenol-preferring, member 1 | 16p12.1 |
| NM_176825 | 6819 | SULT1C2 | sulfotransferase family, cytosolic, 1C, member 2 | 2q11.1-q11.2 |
| BC035514 | 7010 | TEK | TEK tyrosine kinase, endothelial (venous malformations, multiple cutaneous and mucosal) | 9p21 |
| NM_005423 | 7032 | TFF2 | trefoil factor 2 (spasmolytic protein 1) | 21q22.3 |
| NM_003226 | 7033 | TFF3 | trefoil factor 3 (intestinal) | 21q22.3 |
| NM_004616 | 7103 | TSPAN8 | tetraspanin 8 | 12q14.1-q21.1 |
| BC053545 | 7168 | TPM1 | tropomyosin 1 (alpha) | 15q22.1 |
| NM_003297 | 7181 | NR2C1 | nuclear receptor subfamily 2, group C, member 1 | 12q22 |
| NM_006952 | 7348 | UPK1B | uroplakin 1B | 3q13.3-q21 |
| BC046117 | 7802 | DNALI1 | dynein, axonemal, light intermediate chain 1 | 1p35.1 |
| NM_005667 | 7844 | RNF103 | ring finger protein 103 | 2p11.2 |
| NM_006533 | 8190 | MIA | melanoma inhibitory activity | 19q13.32-q13.33 |
| NM_021969 | 8431 | NR0B2 | nuclear receptor subfamily 0, group B, member 2 | 1p36.1 |
| NM_003657 | 8537 | BCAS1 | breast carcinoma amplified sequence 1 | 20q13.2-q13.3 |
| NM_003725 | 8630 | HSD17B6 | hydroxysteroid (17-beta) dehydrogenase 6 homolog (mouse) | 12q13 |
| NM_003837 | 8789 | FBP2 | fructose-1,6-bisphosphatase 2 | 9q22.3 |
| NM_004293 | 9615 | GDA | guanine deaminase | 9q21.13 |
| NM_005720 | 10095 | ARPC1B | actin related protein 2/3 complex, subunit 1B, 41kDa | 7q22.1 |
| NM_005724 | 10099 | TSPAN3 | tetraspanin 3 | 15q24.3 |
| NM_020997 | 10637 | LEFTY1 | left-right determination factor 1 | 1q42.1 |
| NM_006548 | 10644 | IGF2BP2 | insulin-like growth factor 2 mRNA binding protein 2 | 3q27.2 |
| AF289022 | 10841 | FTCD | formiminotransferase cyclodeaminase | 21q22.3 |
| NM_014270 | 11136 | SLC7A9 | solute carrier family 7 (cationic amino acid transporter, y+ system), member 9 | 19q13.1 |
| BC010522 | 22874 | PLEKHA6 | pleckstrin homology domain containing, family A member 6 | 1q32.1 |
| NM_014962 | 22903 | BTBD3 | BTB (POZ) domain containing 3 | 20p12.2 |
| NM_012248 | 22928 | SEPHS2 | selenophosphate synthetase 2 | 16p11.2 |
| NM_198187 | 23245 | ASTN2 | astrotactin 2 | 9q33.1 |
| BX641152 | 23504 | RIMBP2 | RIMS binding protein 2 | 12q24.33 |
| NM_015359 | 23516 | SLC39A14 | solute carrier family 39 (zinc transporter), member 14 | 8p21.3 |
| NM_014343 | 24146 | CLDN15 | claudin 15 | 7q11.22 |
| BC056235 | 27283 | TINAG | tubulointerstitial nephritis antigen | 6p11.2-p12 |
| NM_014471 | 27290 | SPINK4 | serine peptidase inhibitor, Kazal type 4 | 9p13.3 |
| BC004300 | 50853 | VILL | villin-like | 3p21.3 |
| NM_016027 | 51110 | LACTB2 | lactamase, beta 2 | 8p22-q22.3 |
| NM_001002026 | 51208 | CLDN18 | claudin 18 | 3q22.3 |
| AF448439 | 54102 | CLIC6 | chloride intracellular channel 6 | 21q22.12 |
| NM_017726 | 54866 | PPP1R14D | protein phosphatase 1, regulatory (inhibitor) subunit 14D | 15q15.1 |
| NM_017878 | 54979 | HRASLS2 | HRAS-like suppressor 2 | 11q12.3 |
| NM_018638 | 55500 | ETNK1 | ethanolamine kinase 1 | 12p12.1 |
| NM_152278 | 56849 | TCEAL7 | transcription elongation factor A (SII)-like 7 | Xq22.1 |
| NM_020130 | 56892 | C8orf4 | chromosome 8 open reading frame 4 | 8p11.2 |
| NM_020167 | 56923 | NMUR2 | neuromedin U receptor 2 | 5q33.1 |
| NM_022068 | 63895 | FAM38B | family with sequence similarity 38, member B | 18p11.22 |
| NM_032401 | 64699 | TMPRSS3 | transmembrane protease, serine 3 | 21q22.3 |
| NM_023930 | 65987 | KCTD14 | potassium channel tetramerisation domain containing 14 | 11q14.1 |
| NM_024101 | 79083 | MLPH | melanophilin | 2q37.3 |
| NM_024320 | 79170 | ATAD4 | ATPase family, AAA domain containing 4 | 17q21.32 |
| NM_139053 | 79574 | EPS8L3 | EPS8-like 3 | 1p13.3 |
| BC012056 | 79754 | ASB13 | ankyrin repeat and SOCS box-containing 13 | 10p15.1 |
| AK128620 | 80168 | MOGAT2 | monoacylglycerol O-acyltransferase 2 | 11q13.5 |
| NM_030796 | 81552 | VOPP1 | vesicular, overexpressed in cancer, prosurvival protein 1 | 7p11.2 |
| NM_031305 | 83478 | ARHGAP24 | Rho GTPase activating protein 24 | 4q21.23-q21.3 |
| NM_032744 | 84830 | C6orf105 | chromosome 6 open reading frame 105 | 6p24.1 |
| NM_033211 | 90355 | C5orf30 | chromosome 5 open reading frame 30 | 5q21.1 |
| AK091467 | 114804 | RNF157 | ring finger protein 157 | 17q25.1 |
| NM_052946 | 115677 | NOSTRIN | nitric oxide synthase trafficker | 2q24.3 |
| NM_198447 | 127845 | GOLT1A | golgi transport 1 homolog A (S. cerevisiae) | 1q32.1 |
| BC018203 | 130576 | LOC130576 | - | 2q23.2 |
| NM_152392 | 130872 | AHSA2 | AHA1, activator of heat shock 90kDa protein ATPase homolog 2 (yeast) | 2p15 |
| NM_153343 | 133121 | ENPP6 | ectonucleotide pyrophosphatase/phosphodiesterase 6 | 4q35.1 |
| NM_153345 | 135932 | TMEM139 | transmembrane protein 139 | 7q34 |
| BC028199 | 146722 | CD300LF | CD300 molecule-like family member f | 17q25.1 |
| NM_173549 | 203111 | C8orf47 | chromosome 8 open reading frame 47 | 8q22.2 |
| NM_198990 | 222236 | NAPEPLD | N-acyl phosphatidylethanolamine phospholipase D | 7q22.1 |
| NM_173561 | 222643 | UNC5CL | unc-5 homolog C (C. elegans)-like | 6p21.1 |
| NM_175888 | 253639 | ZNF620 | zinc finger protein 620 | 3p22.1 |
| AF370405 | 340485 | ASAH3L | N-acylsphingosine amidohydrolase 3-like | 9p22.1 |
| AY259177 | 389434 | IYD | iodotyrosine deiodinase | 6q25.1 |
| AK124321 | 389602 | tcag7.1275 | - | 7q36.3 |
